# Supplementary material for: First Isolation of Yarrowia lipolytica in a Granulomatous Pneumonia of a Spectacled Caiman, Caiman crocodilus Linnaeus, 1758
Source: MDPI journal article supplement (doi:10.3390/pathogens11111255), 2022-10-28
Supplement: s1 [file s1]

**Table S1:** Description of the six macroscopically visible nodules evidenced in the right lung of the spectacled caiman

| Number | Diameter in cm | Description                                                                                                                                                                                                    |
|--------|----------------|----------------------------------------------------------------------------------------------------------------------------------------------------------------------------------------------------------------|
| 1      | 1,5            | The nodule presented a thick white wall and an increased consistency respect the lung tissue. After cutting, internally a white material surrounding by reddish tissue and a clear fluid were evidenced.       |
| 2      | 1,3            | The nodule presented a thick white wall and an increased consistency respect the lung tissue. After cutting, internally a white material surrounding by reddish tissue and a clear fluid were evidenced.       |
| 3      | 1,2            | The nodule presented a thick white wall and an increased consistency respect the lung tissue. After cutting, internally a reddish tissue was evidenced.                                                        |
| 4      | 1,2            | The nodule presented a thick white wall and an increased consistency respect the lung tissue. After cutting, internally a reddish tissue was evidenced.                                                        |
| 5      | 0,9            | The nodule presented a reddish wall and an increased consistency respect the lung tissue. After cutting, internally a reddish tissue was evidenced. The tissue of the lung surrounding the nodule was reddish. |
| 6      | 0,8            | The nodule presented a reddish wall and an increased consistency respect the lung tissue. After cutting, internally a reddish tissue was evidenced. The tissue of the lung surrounding the nodule was reddish. |
